# Supplementary material for: Decreased intranuclear cardiac troponin I impairs cardiac autophagy through FOS/ATG5 in ageing hearts
Source: PubMed Central journal article supplement (PMC11057418; doi:10.1111/jcmm.18357), 2024-04-29
Supplement: JCMM-28-e18357-s001.pdf [file JCMM-28-e18357-s001.pdf]

| gene_name | log2FoldC | pvalue   | padj     |
|-----------|-----------|----------|----------|
| Tnni3     | -14.2462  | 3.2E-153 | 4.6E-149 |
| S100a8    | 2.355363  | 9.76E-19 | 7.03E-15 |
| Rtn4r     | -3.03448  | 1.03E-14 | 4.96E-11 |
| Cav1      | -1.17609  | 3.11E-14 | 9.08E-11 |
| Lrp8      | 2.438065  | 3.15E-14 | 9.08E-11 |
| Eps8l1    | -3.61201  | 2.73E-12 | 6.56E-09 |
| S100a9    | 2.048376  | 1.79E-11 | 3.22E-08 |
| Egr1      | -2.30673  | 9.24E-11 | 1.33E-07 |
| Ifitm6    | 2.788911  | 1.37E-10 | 1.79E-07 |
| Stfa3     | 3.559508  | 1.84E-10 | 2.21E-07 |
| Gimap4    | -1.13221  | 1.15E-09 | 1.19E-06 |
| Synpo2l   | 1.214098  | 3.17E-09 | 2.85E-06 |
| Nppa      | 1.676714  | 9.14E-09 | 7.75E-06 |
| Ifi203    | -1.51883  | 1.16E-08 | 9.25E-06 |
| Rasgrp3   | -1.10417  | 1.81E-08 | 1.38E-05 |
| Ccdc8     | 1.311213  | 3.61E-08 | 2.48E-05 |
| Adamts8   | 1.657364  | 5.71E-08 | 3.74E-05 |
| Lcn2      | 1.677997  | 6.29E-08 | 3.94E-05 |
| Efnb3     | 1.657092  | 7.55E-08 | 4.35E-05 |
| Ppp1r16b  | -1.29426  | 8.42E-08 | 4.66E-05 |
| Cilp2     | -2.24317  | 1.2E-07  | 6.2E-05  |
| S1pr3     | -1.1989   | 2.73E-07 | 0.000136 |
| Akr1c14   | -1.5052   | 3.48E-07 | 0.000167 |
| Tspan13   | -1.0225   | 4.19E-07 | 0.000189 |
| Srgn      | -1.10112  | 7.44E-07 | 0.000325 |
| Gpr157    | -1.0569   | 8.99E-07 | 0.000366 |
| Tnfrsf12a | 1.39064   | 9.14E-07 | 0.000366 |
| Stfa2     | 2.407692  | 9.99E-07 | 0.000389 |
| Scgb1a1   | -21.4285  | 1.17E-06 | 0.000425 |
| Myadm     | -1.10888  | 1.21E-06 | 0.000425 |
| Capn11    | -21.399   | 1.21E-06 | 0.000425 |
| Sfrp2     | 1.164023  | 1.24E-06 | 0.000425 |
| Hspb7     | 1.020764  | 1.49E-06 | 0.00047  |
| Art1      | -1.11625  | 1.51E-06 | 0.00047  |
| Tnnt3     | 3.004092  | 1.53E-06 | 0.00047  |
| Cd177     | 2.834109  | 2.2E-06  | 0.000597 |
| St8sia4   | -1.39181  | 2.7E-06  | 0.000695 |
| Fosb      | -2.45942  | 2.87E-06 | 0.000705 |
| Kctd12b   | -1.88866  | 2.89E-06 | 0.000705 |
| Smim5     | 1.147719  | 3.01E-06 | 0.000722 |
| Scgb3a2   | -20.5478  | 3.15E-06 | 0.00073  |
| Prdm1     | -2.3339   | 3.17E-06 | 0.00073  |
| Nts       | -2.19034  | 3.19E-06 | 0.00073  |
| Slc25a25  | -1.91015  | 3.43E-06 | 0.000771 |
| Retnlg    | 1.81051   | 3.56E-06 | 0.000787 |
| Edn1      | 1.080073  | 3.95E-06 | 0.000837 |
| Cdc42ep2  | -1.03168  | 5.17E-06 | 0.001049 |
| Il2rg     | -1.56544  | 5.99E-06 | 0.001136 |
| Armc2     | -2.08146  | 6.13E-06 | 0.001146 |
| Gpr4      | -1.15907  | 6.25E-06 | 0.001155 |
| Ifi27l2a  | -1.28008  | 6.4E-06  | 0.001167 |
| Mmp9      | 2.237935  | 6.86E-06 | 0.001236 |
| Spsb4     | 1.245244  | 7.82E-06 | 0.001391 |
| Kcnf1     | 6.389371  | 8.9E-06  | 0.001509 |
| Nt5e      | 1.099671  | 9.49E-06 | 0.001591 |
| Mr1       | 1.005062  | 1.23E-05 | 0.001966 |
| Masp1     | 1.219214  | 1.3E-05  | 0.002039 |

|          |          |          |          |
|----------|----------|----------|----------|
| Ltf      | 2.491225 | 1.61E-05 | 0.002417 |
| Sez6l2   | -1.43688 | 1.63E-05 | 0.002417 |
| Olfr1396 | -1.65036 | 1.7E-05  | 0.002498 |
| Alad     | -1.13389 | 2.12E-05 | 0.003051 |
| Irf7     | -1.33397 | 2.14E-05 | 0.003055 |
| Frem2    | 1.096875 | 2.2E-05  | 0.003108 |
| Stfa2l1  | 2.47123  | 2.39E-05 | 0.003316 |
| Clu      | 1.039831 | 2.64E-05 | 0.003567 |
| Aplnr    | -1.18365 | 2.65E-05 | 0.003567 |
| Pirt     | 1.16874  | 2.9E-05  | 0.003778 |
| Tent5b   | 1.708058 | 2.91E-05 | 0.003778 |
| Gstp2    | 2.198359 | 3.01E-05 | 0.003796 |
| Myh7     | 5.10344  | 3.02E-05 | 0.003796 |
| Usp11    | 1.271275 | 3.15E-05 | 0.003853 |
| Ier2     | -1.24794 | 3.18E-05 | 0.003853 |
| Asprv1   | 2.273739 | 3.27E-05 | 0.00389  |
| Adra1b   | 1.099005 | 3.36E-05 | 0.003971 |
| Gimap6   | -1.0698  | 3.59E-05 | 0.004133 |
| Arhgap18 | -1.01945 | 3.61E-05 | 0.004133 |
| Pcdh17   | -1.1364  | 4.41E-05 | 0.004823 |
| Gfpt2    | -1.1029  | 4.46E-05 | 0.004823 |
| Ndufa4l2 | -1.04175 | 4.46E-05 | 0.004823 |
| Lgals3bp | -1.08221 | 4.53E-05 | 0.004823 |
| Cd248    | -1.18383 | 4.57E-05 | 0.004823 |
| Plk3     | -1.81682 | 4.58E-05 | 0.004823 |
| Dusp5    | -1.64308 | 4.72E-05 | 0.004925 |
| Ifi44    | -1.95709 | 4.86E-05 | 0.004953 |
| Camk1d   | 1.183573 | 4.87E-05 | 0.004953 |
| Optn     | -1.06549 | 4.98E-05 | 0.004985 |
| Stfa1    | 2.159601 | 5.1E-05  | 0.005059 |
| Galm     | -1.08773 | 5.16E-05 | 0.00506  |
| Bcl6b    | -1.36226 | 5.56E-05 | 0.00534  |
| Tlnrd1   | -1.06053 | 6.23E-05 | 0.005718 |
| Mt1      | -1.10165 | 7.03E-05 | 0.006295 |
| Spry4    | -1.31987 | 8.49E-05 | 0.007324 |
| Meox2    | -1.26141 | 0.000107 | 0.008875 |
| Tox3     | 1.085323 | 0.000111 | 0.009136 |
| Camk1g   | 1.406452 | 0.000131 | 0.010137 |
| Ifit1    | -1.57584 | 0.000134 | 0.010265 |
| Fgf12    | 1.156077 | 0.000142 | 0.010678 |
| Nuak1    | 1.155785 | 0.000147 | 0.010906 |
| Tnni1    | 3.694102 | 0.000186 | 0.013358 |
| Podxl2   | 1.060666 | 0.000188 | 0.013405 |
| Ctla2a   | -1.31037 | 0.000199 | 0.013955 |
| Cpt1b    | 1.49063  | 0.000205 | 0.01423  |
| Slfn4    | 1.554265 | 0.000209 | 0.014301 |
| Gbp2     | -1.02807 | 0.000242 | 0.015481 |
| Pdgfb    | -1.2216  | 0.000242 | 0.015481 |
| Apln     | -1.48436 | 0.000247 | 0.01567  |
| Kcnv2    | -1.85513 | 0.000253 | 0.01584  |
| Tppp3    | -1.17386 | 0.000256 | 0.015893 |
| Nrarp    | -1.90045 | 0.000281 | 0.017026 |
| Camp     | 2.400671 | 0.000301 | 0.018174 |
| Dnah8    | -2.47647 | 0.000313 | 0.018719 |
| Nos2     | -1.25603 | 0.000332 | 0.019668 |
| Fbn2     | 1.289643 | 0.000334 | 0.019749 |
| Cyfp2    | -1.09472 | 0.000348 | 0.020215 |
| Herc3    | 1.275594 | 0.000349 | 0.020215 |

|          |          |          |          |
|----------|----------|----------|----------|
| Csf2rb   | 1.260726 | 0.000349 | 0.020215 |
| C530008M | 1.166799 | 0.000352 | 0.020264 |
| Plekho2  | -1.01787 | 0.000363 | 0.020864 |
| Hlx      | -1.3305  | 0.000415 | 0.02232  |
| AU021092 | -1.08228 | 0.000415 | 0.02232  |
| Nepn     | -1.88212 | 0.000431 | 0.022918 |
| Fmr1nb   | 3.368181 | 0.000447 | 0.023354 |
| Fos      | -3.58984 | 0.000449 | 0.023354 |
| Sphk1    | 1.235953 | 0.000456 | 0.023655 |
| Ankrd1   | 1.131334 | 0.000462 | 0.023799 |
| Kcnmb1   | -1.70171 | 0.0005   | 0.024998 |
| Adam33   | 1.684793 | 0.000512 | 0.025431 |
| Ppfia4   | 1.159125 | 0.000541 | 0.026348 |
| Wfikkn2  | 1.710251 | 0.00056  | 0.027091 |
| Adora1   | 1.282662 | 0.000576 | 0.027653 |
| Kcna4    | 1.299212 | 0.000589 | 0.028203 |
| H2-T24   | -1.13862 | 0.000605 | 0.028728 |
| Jun      | -1.17688 | 0.00064  | 0.029793 |
| Fgfbp3   | 1.258313 | 0.000666 | 0.030762 |
| Snca     | -1.3541  | 0.00075  | 0.033895 |
| Phf11d   | -1.07109 | 0.00075  | 0.033895 |
| Tox      | 1.845111 | 0.000773 | 0.0348   |
| Cyt11    | -1.29885 | 0.000838 | 0.037366 |
| Prune2   | -1.1533  | 0.000923 | 0.040294 |
| Ramp3    | -1.39791 | 0.000963 | 0.041615 |
| Scin     | 1.307236 | 0.000983 | 0.04212  |
| Spin4    | -1.41494 | 0.000989 | 0.04212  |
| Prkag3   | 1.825307 | 0.001004 | 0.04212  |
| Bhlhe40  | -1.18226 | 0.001047 | 0.043165 |
| Mmp8     | 1.900653 | 0.001128 | 0.04579  |
| Nr4a1    | -3.35537 | 0.001129 | 0.04579  |
| Chil3    | 1.863987 | 0.001204 | 0.047875 |
| Atg9b    | -1.8528  | 0.001205 | 0.047875 |
| Arc      | -3.56939 | 0.001237 | 0.048589 |
| Stk32b   | 1.863464 | 0.00126  | 0.048954 |
| Apold1   | -3.44004 | 0.001291 | 0.049844 |
| Shisa4   | 1.230992 | 0.001293 | 0.049844 |
