# Supplementary material for: Decreased intranuclear cardiac troponin I impairs cardiac autophagy through FOS/ATG5 in ageing hearts
Source: PubMed Central journal article supplement (PMC11057418; doi:10.1111/jcmm.18357), 2024-04-29
Supplement: JCMM-28-e18357-s003.pdf [file JCMM-28-e18357-s003.pdf]

qPCR primers

| <b>Gene</b>    | <b>sequence</b>                | <b>product (bp)</b> |
|----------------|--------------------------------|---------------------|
| GAPDH Forward  | 5'-AAGAAGGTGGTGAAGCAGGCATC-3'  | 118                 |
| GAPDH Reverse  | 5'-CGGCATCGAAGGTGGAAGAGTG-3'   | 118                 |
| TNNI3 Forward  | 5'-AGGAGATGGAACGAGAGGCAGAAG-3' | 129                 |
| TNNI3 Reverse  | 5'-CGTGAAGCTGTCGGCATAAGTCC-3'  | 129                 |
| S100a8 Forward | 5'-GGAGTTCCTTGCATGGTGA-3'      | 78                  |
| S100a8 Reverse | 5'-GGCCAGAAGCTCTGCTACTC-3'     | 78                  |
| S100a9 Forward | 5'-CTGCATGAGAACAACCCA-3'       | 125                 |
| S100a9 Reverse | 5'-AGGCCATTGAGTAAGCCA-3'       | 125                 |
| Lrp8 Forward   | 5'-CCGGCAAACACTGGTTTCAG-3'     | 592                 |
| Lrp8 Reverse   | 5'-CTGGTAGGTAGGGTCGTGGA-3'     | 592                 |
| Egr1 Forward   | 5'-AGTCGGGCTCCCAGGACTTA-3'     | 326                 |
| Egr1 Reverse   | 5'-GGCAAACCTCCTCCCACAAAT-3'    | 326                 |
| Fos Forward    | 5'-TTTATCCCCACGGTGACAGC-3'     | 598                 |
| Fos Reverse    | 5'-TGCTCTTGACTGGCTCCAAG-3'     | 598                 |
| Fosb Forward   | 5'-GTGTAGCTCATCACCTCCG-3'      | 507                 |
| Fosb Reverse   | 5'-AGTCGATCTGTCAGCTCCCT-3'     | 507                 |
| Mmp9 Forward   | 5'-CCGCGAGACATGATCGATGA-3'     | 521                 |
| Mmp9 Reverse   | 5'-CCTTTAGTGGTGCAGGCAGA-3'     | 521                 |
| Gstp2 Forward  | 5'-CTACTTCCCAAGTCCAGGGC-3'     | 590                 |
| Gstp2 Reverse  | 5'-TGGGACGGTTCACATGTTCC-3'     | 590                 |
| Nr4a1 Forward  | 5'-TCCCCGAGCCAGACTTATGA-3'     | 587                 |
| Nr4a1 Reverse  | 5'-GGCTGCTTGGGTTTTGAAGG-3'     | 587                 |
